# Supplementary material for: Serum Apolipoprotein B and A1 Concentrations Predict Late-Onset Posttransplant Diabetes Mellitus in Prevalent Adult Kidney Transplant Recipients
Source: PubMed Central journal article supplement — Can J Kidney Health Dis. 2019 May 25;6:2054358119850536. doi: 10.1177/2054358119850536 (PMC6535897; doi:10.1177/2054358119850536), 2019-05-25
Supplement: Apolipoprotein_supplementary_tables_FINAL_UNMARKED_April_2019.pdf [file Apolipoprotein_supplementary_tables_FINAL_UNMARKED_April_2019.pdf]

**Supplementary. Table 1:** Patient/transplant characteristics across Apolipoproteins B/A1 quartiles, 2010-2015

| Characteristic                             | Q1, N=135  | Q2, N=136  | Q3, N=137  | Q4, N=137  | R <sup>2</sup> | P      |
|--------------------------------------------|------------|------------|------------|------------|----------------|--------|
| Patient count, f/u time (p-y)              | 135, 315.0 | 136, 303.9 | 137, 320.6 | 137, 301.7 | ---            | ---    |
| Apolipoprotein B/A1 ratio                  | 0.4±0.1    | 0.5±0.0    | 0.6±0.0    | 0.8±0.2    | ---            | ---    |
| Apolipoprotein A1 (g/L)                    | 1.8±0.3    | 1.6±0.3    | 1.5±0.3    | 1.3±0.2    | 0.293          | <0.001 |
| Apolipoprotein B (g/L)                     | 0.6±0.1    | 0.7±0.1    | 0.9±0.2    | 1.0±0.2    | 0.619          | <0.001 |
| <b>Demography/Allograft Data</b>           |            |            |            |            |                |        |
| Age at bloodwork (years)                   | 53.1±12.8  | 54.3±12.9  | 53.9±13.9  | 53.1±13.2  | -0.001         | 0.694  |
| Age at transplant (years)                  | 52.7±12.9  | 53.7±13.0  | 53.4±13.9  | 52.7±13.3  | -0.001         | 0.629  |
| >2 transplants                             | 7, 2.5%    | 10, 3.6%   | 10, 3.6%   | 11, 4.0%   | ---            | ---    |
| Live donor                                 | 50, 18.1%  | 59, 21.4%  | 49, 17.8%  | 45, 16.3%  | ---            | ---    |
| Male                                       | 66, 23.9%  | 79, 28.6%  | 85, 30.8%  | 96, 34.8%  | ---            | ---    |
| Ethnicity                                  | 53, 19.2%  | 41, 14.9%  | 49, 17.8%  | 47, 17.0%  | ---            | ---    |
| <b>ESRD Cause</b>                          |            |            |            |            |                |        |
| Hypertension                               | 12, 4.35%  | 24, 8.7%   | 23, 8.33%  | 14, 5.0%   | ---            | ---    |
| Glomerulonephritis                         | 43, 15.6%  | 44, 15.9%  | 42, 15.2%  | 50, 18.1%  | ---            | ---    |
| Polycystic Kidney Disease                  | 18, 6.5%   | 19, 6.9%   | 18, 6.52%  | 27, 9.8%   | ---            | ---    |
| <b>Clinical Characteristics</b>            |            |            |            |            |                |        |
| Height (cm)                                | 166.8±30.2 | 168.3±29.7 | 170.1±22.8 | 169.7±33.4 | 0.006          | 0.048* |
| Weight (kg)                                | 70.6±17.0  | 71.3±15.9  | 74.8±16.3  | 75.5±15.6  | 0.008          | 0.018* |
| Body-mass index (kg/m <sup>2</sup> )       | 25.3±4.7   | 25.1±4.8   | 25.6±4.5   | 26.2±4.8   | 0.004          | 0.082  |
| Systolic BP (mmHg)                         | 129.8±15.5 | 129.7±14.4 | 128.5±17.4 | 129.7±15.4 | 0.000          | 0.385  |
| Diastolic BP (mmHg)                        | 81.2±9.5   | 81.6±10.2  | 81.2±10.2  | 82.3±10.3  | 0.000          | 0.494  |
| Waist circumference (cm)                   | 89.1±16.1  | 90.0±20.2  | 94.0±14.3  | 95.3±20.5  | 0.022          | 0.005  |
| Hip circumference (cm)                     | 94.9±13.6  | 95.0±19.3  | 97.8±11.8  | 98.4±19.4  | 0.039          | 0.039  |
| Waist-to-hip ratio                         | 0.94±0.08  | 0.95±0.16  | 0.96±0.08  | 0.97±0.18  | 0.027          | <0.001 |
| <b>Laboratory Measurements</b>             |            |            |            |            |                |        |
| Fasting blood glucose                      | 5.6±2.1    | 5.7±1.7    | 5.9±2.4    | 6.1±1.8    | 0.013          | 0.004  |
| Random blood glucose                       | 6.1±2.4    | 6.1±2.3    | 6.5±3.2    | 6.8±2.5    | 0.008          | 0.018* |
| HbA1c                                      | 5.5±1.0    | 5.6±0.8    | 5.6±1.0    | 5.8±1.1    | 0.015          | 0.002  |
| Total cholesterol                          | 4.2±1.2    | 4.6±1.3    | 4.6±1.2    | 5.2±1.42   | 0.147          | <0.001 |
| HDL-cholesterol                            | 1.7±0.6    | 1.4±0.5    | 1.3±0.4    | 1.1±0.4    | 0.211          | <0.001 |
| LDL-cholesterol                            | 2.0±0.9    | 2.3±1.0    | 2.5±1.1    | 3.2±1.4    | 0.289          | <0.001 |
| HDL/LDL ratio                              | 1.2±0.6    | 1.7±0.7    | 2.0±0.8    | 3.0±1.4    | 0.610          | <0.001 |
| Triglycerides                              | 1.4±1.08   | 1.6±0.8    | 1.9±0.8    | 2.4±1.3    | 0.157          | <0.001 |
| Non-HDL cholesterol                        | 2.6±0.9    | 3.03±1.0   | 3.3±0.9    | 4.1±1.3    | 0.377          | <0.001 |
| Total cholesterol/HDL ratio                | 2.8±0.9    | 3.2±0.9    | 3.8±0.9    | 5.3±3.8    | 0.318          | <0.001 |
| C-reactive protein (mg/L)                  | 3.4±9.7    | 3.5±5.2    | 4.8±8.0    | 10.5±26.9  | 0.004          | <0.001 |
| Parathyroid hormone (pmol/L)               | 14.0±16.1  | 15.0±16.8  | 13.8±11.9  | 18.5±20.0  | 0.006          | 0.035  |
| Vitamin D25 (nmol/L)                       | 49.0±27.5  | 50.8±25.5  | 47.3±24.3  | 42.6±26.1  | 0.013          | 0.005  |
| Uric Acid (μmol/L)                         | 348.4±102. | 347.7±93.5 | 369.6±92.2 | 390.3±111. | 0.035          | <0.001 |
| 24h urine protein (g/d)                    | 0.7±0.36   | 0.8±0.5    | 0.7±0.4    | 1.1±0.5    | -0.009         | 0.623  |
| <b>Renal Function/Outcomes</b>             |            |            |            |            |                |        |
| Serum creatinine (μmol/L)                  | 120.7±56.5 | 116.3±35.5 | 127.4±50.2 | 136.8±90.9 | 0.015          | 0.003  |
| Estimated GFR (ml/min/1.73m <sup>2</sup> ) | 56.8±19.8  | 57.1±17.6  | 53.7±18.5  | 54.9±19.9  | 0.006          | 0.044  |
| Urine ACR (mg/mmol)                        | 7.1±13.2   | 8.4±40.2   | 8.2±15.3   | 12.1±24.9  | 0.002          | 0.126  |
| Graft failure                              | 12, 4.4%   | 9, 3.3%    | 14, 5.1%   | 10, 3.6%   | ---            | 0.895  |
| Metabolic syndrome                         | 95, 34.4%  | 83, 30.1%  | 92, 33.3%  | 96, 34.8%  | ---            | 0.363  |
| Acute rejection                            | 8, 2.9%    | 6, 2.2%    | 11, 4.0%   | 8, 2.9%    | ---            | 0.343  |

|                        |            |            |            |            |     |       |
|------------------------|------------|------------|------------|------------|-----|-------|
| Delayed graft function | 5, 1.8%    | 2, 0.7%    | 8, 2.9%    | 4, 1.5%    | --- | 0.984 |
| <b>Medications</b>     |            |            |            |            |     |       |
| Statin                 | 76, 27.5%  | 63, 22.8%  | 58, 21.0%  | 37, 13.4%  | --- | 0.298 |
| Cyclosporine           | 6, 2.2%    | 9, 3.3%    | 13, 4.7%   | 17, 6.2%   | --- | 0.686 |
| Tacrolimus             | 127, 46.0% | 122, 44.2% | 116, 42.0% | 114, 41.3% | --- | 0.793 |
| Mycophenolate mofetil  | 76, 27.5%  | 72, 26.1%  | 67, 24.3%  | 73, 26.5%  | --- | 0.317 |
| Mycophenolic acid      | 44, 15.9%  | 46, 16.7%  | 52, 18.8%  | 53, 19.2%  | --- | 0.102 |

R statistic not provided for binary characteristics, as logistic regression was used for these characteristics instead of linear regression. Laboratory measurements with unlisted units are mmol/L. Binary factors expressed in (number (N), %) unless otherwise specified. Abbreviations: ACR albumin-to-creatinine ratio, ESRD end-stage renal disease, GFR glomerular filtration rate, HbA1c glycated hemoglobin, HDL high density lipoprotein, LDL low density lipoprotein, p-y patient years

**Supplementary Table 2:** Differences in clinical characteristics between incident PTDM and non-PTDM cases, 2010-2015.

| <b>Variable</b>                   | <b>PTDM (29)</b> | <b>No PTDM (516)</b> | <b>P</b> |
|-----------------------------------|------------------|----------------------|----------|
| Apo A1 (g/L)                      | 1.55±0.30        | 1.52±0.79            | 0.838    |
| Apo B (g/L)                       | 0.96±0.30        | 0.81±0.23            | <0.001   |
| Apo B/A1 ratio                    | 0.64±0.25        | 0.55±0.31            | 0.128    |
| Graft failure                     | 2, 6.9%          | 43, 8.3%             | 0.786    |
| Serum creatinine (mmol/mL)        | 117.1±34.6       | 125.8±76.6           | 0.607    |
| eGFR (ml/min/1.73m <sup>2</sup> ) | 57.4±20.6        | 55.5±30.7            | 0.745    |
| FBS (mmol/L)                      | 7.3±2.3          | 5.7±3.15             | 0.007    |
| RBS (mmol/L)                      | 8.1±4.1          | 6.3±3.56             | <0.001   |
| Cyclosporine                      | 4, 13.8%         | 41, 8.0%             | 0.267    |
| Tacrolimus                        | 24, 82.8%        | 455, 88.2%           | 0.384    |
| Statin                            | 25, 86.2%        | 341, 66.1%           | 0.025    |

Significance assessed using comparison of incidence rates, Student's t-test, or fisher exact test, as appropriate.
